# Supplementary material
Source: Springer Nature journal article supplement (https://www.springermedizin.de/resource/supplementary/13075_2012_3638_MOESM4_ESM.pdf/9694974)

# Weight Change During Experiment

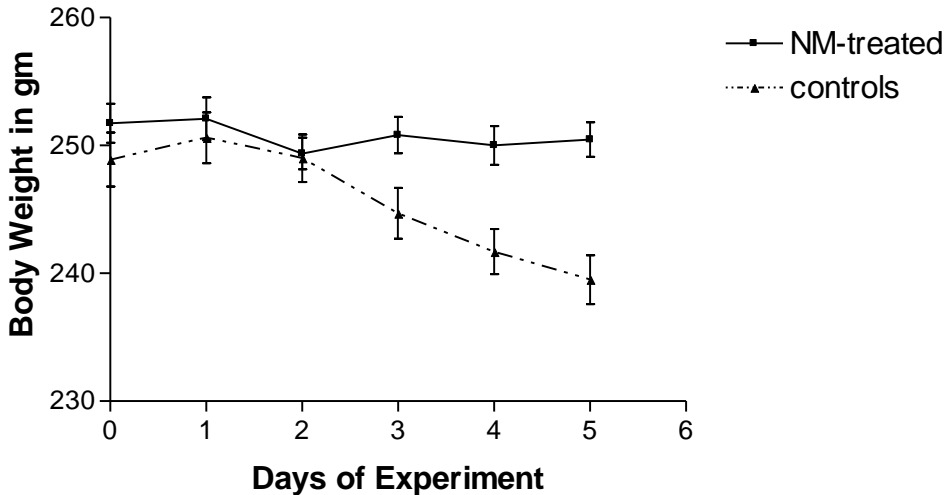

Supplement: MOESM4 [file 9694974]
